# Supplementary material for: Heterobimetallic cerium(iv) oxo clusters supported by a tripodal oxygen ligand
Source: Royal Society of Chemistry journal article supplement (doi:10.1039/c6dt00678g), 2016-01-01
Supplement: c6dt00678g1.pdf [file c6dt00678g1.pdf]

## Electronic Supplementary Information

### Heterobimetallic Cerium(IV) Oxo Clusters Supported by a Tripodal Oxygen Ligand

*Kang-Long Wong,<sup>‡</sup> Yat-Ming So,<sup>‡</sup> Guo-Cang Wang, Herman H.-Y. Sung, Ian D. Williams\*  
and Wa-Hung Leung\**

#### Contents

1. NMR and IR spectra of **3** and **4**
2. MALDI mass spectrum of **4**
3. X-ray photoelectron spectrum of **4**

## 1. NMR and IR Spectra of **3** and **4**

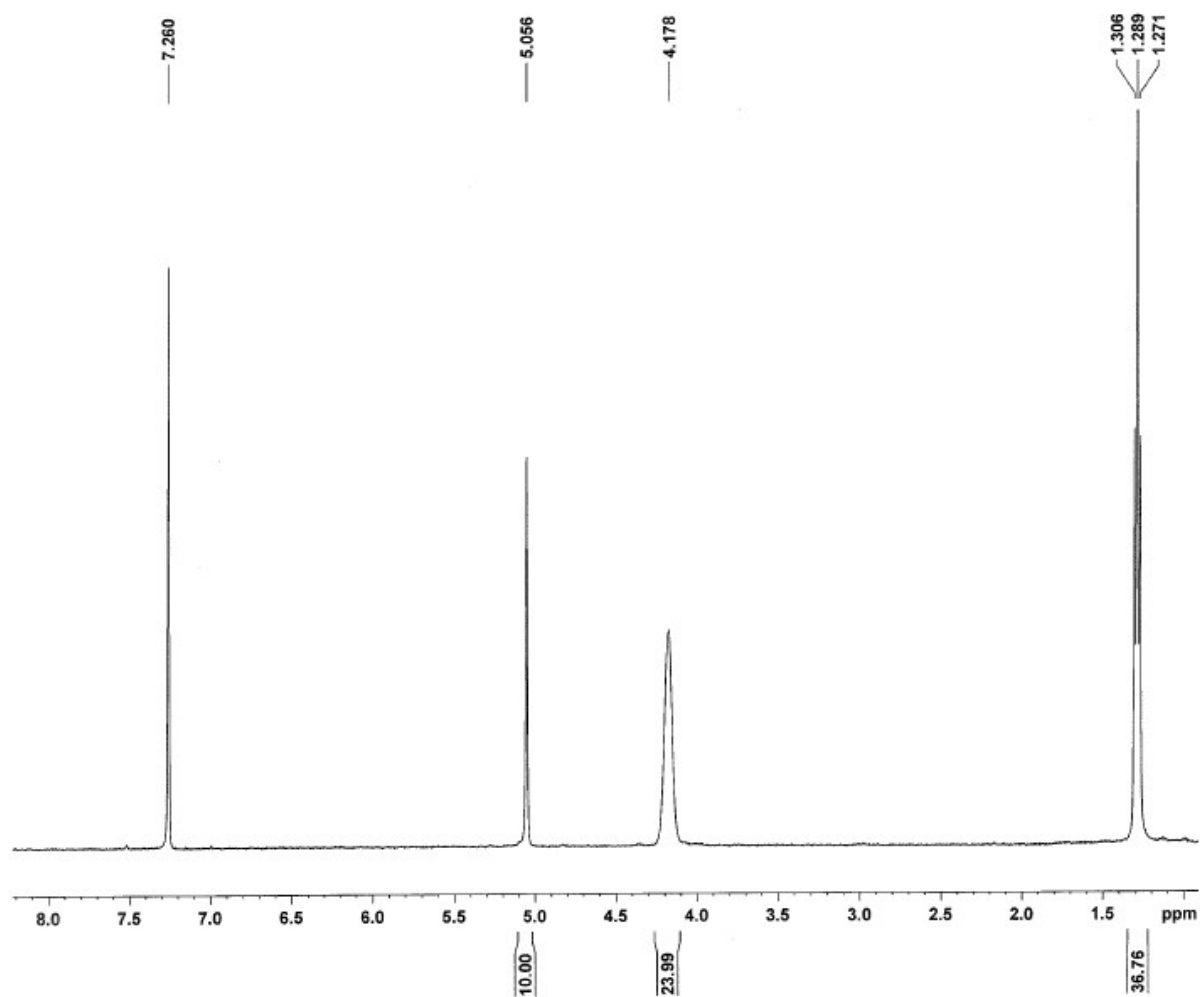

**Figure S1.**  $^1\text{H}$  NMR (400 MHz, 25  $^\circ\text{C}$ ) spectrum of **3** in  $\text{CDCl}_3$ .

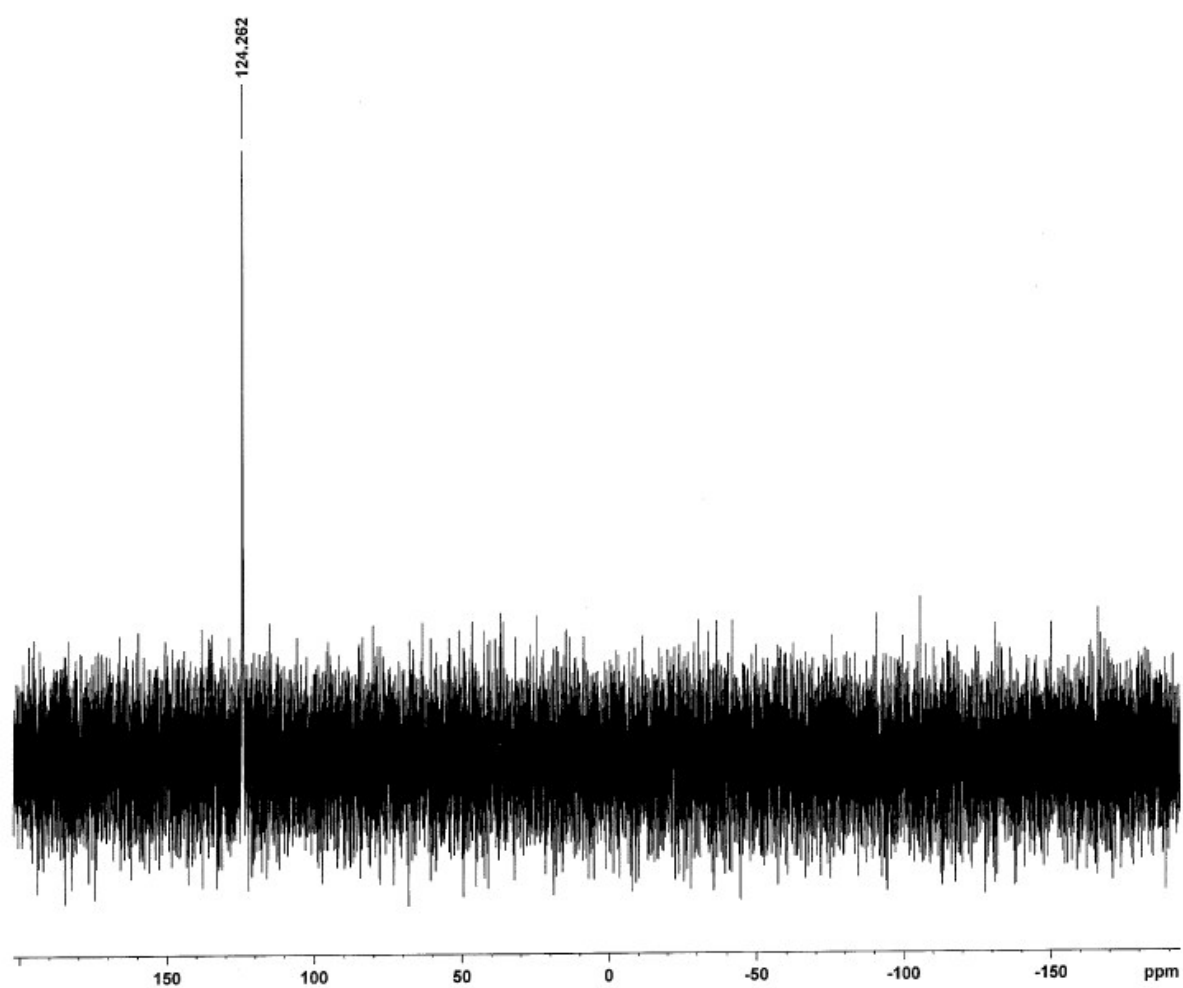

**Figure S2.**  $^{31}\text{P}$   $\{^1\text{H}\}$  NMR (162 MHz, 25 °C) spectrum of **3** in  $\text{CDCl}_3$ .

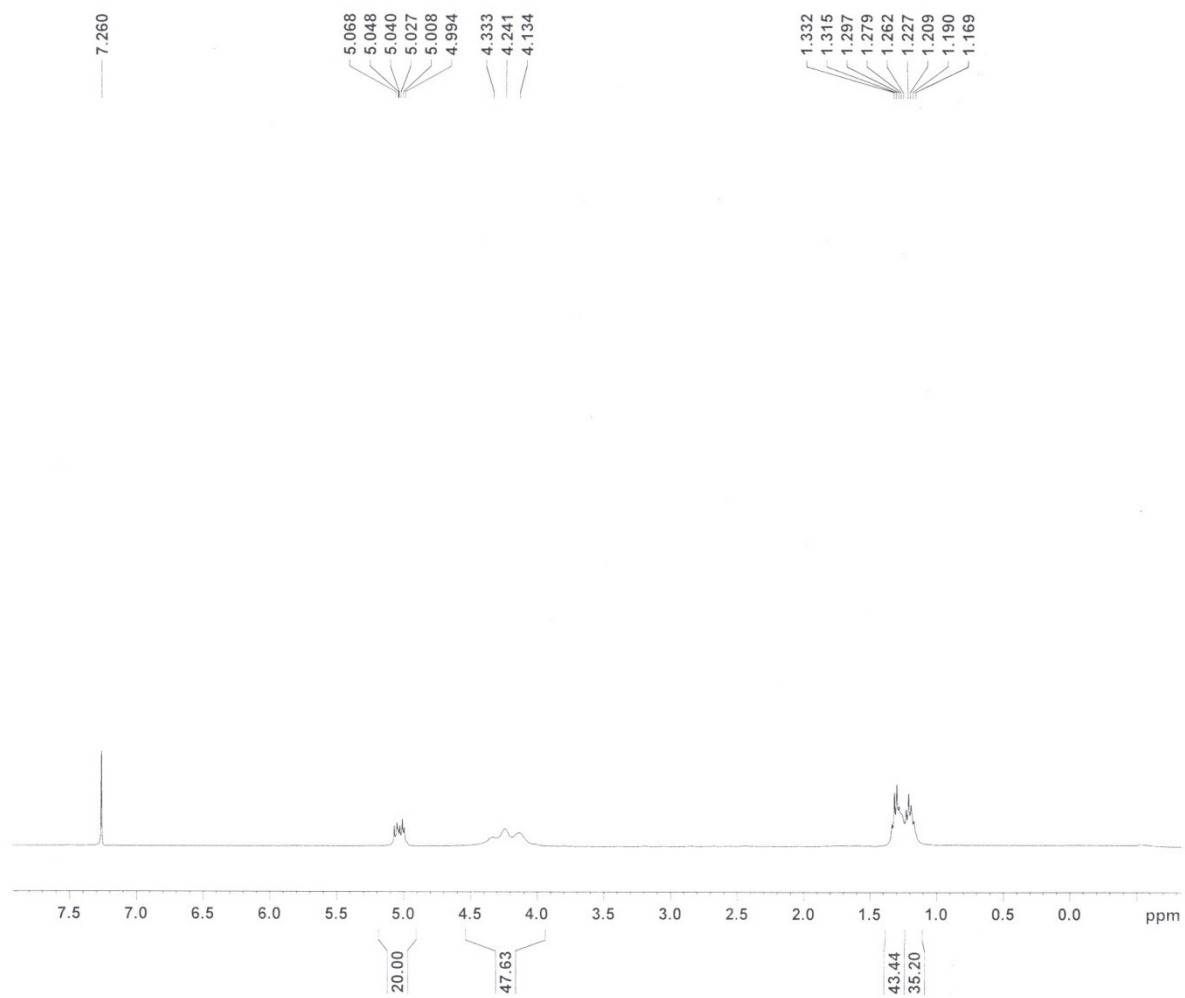

**Figure S3.** <sup>1</sup>H NMR (400 MHz, 25 °C) spectrum of **4** in CDCl<sub>3</sub>.

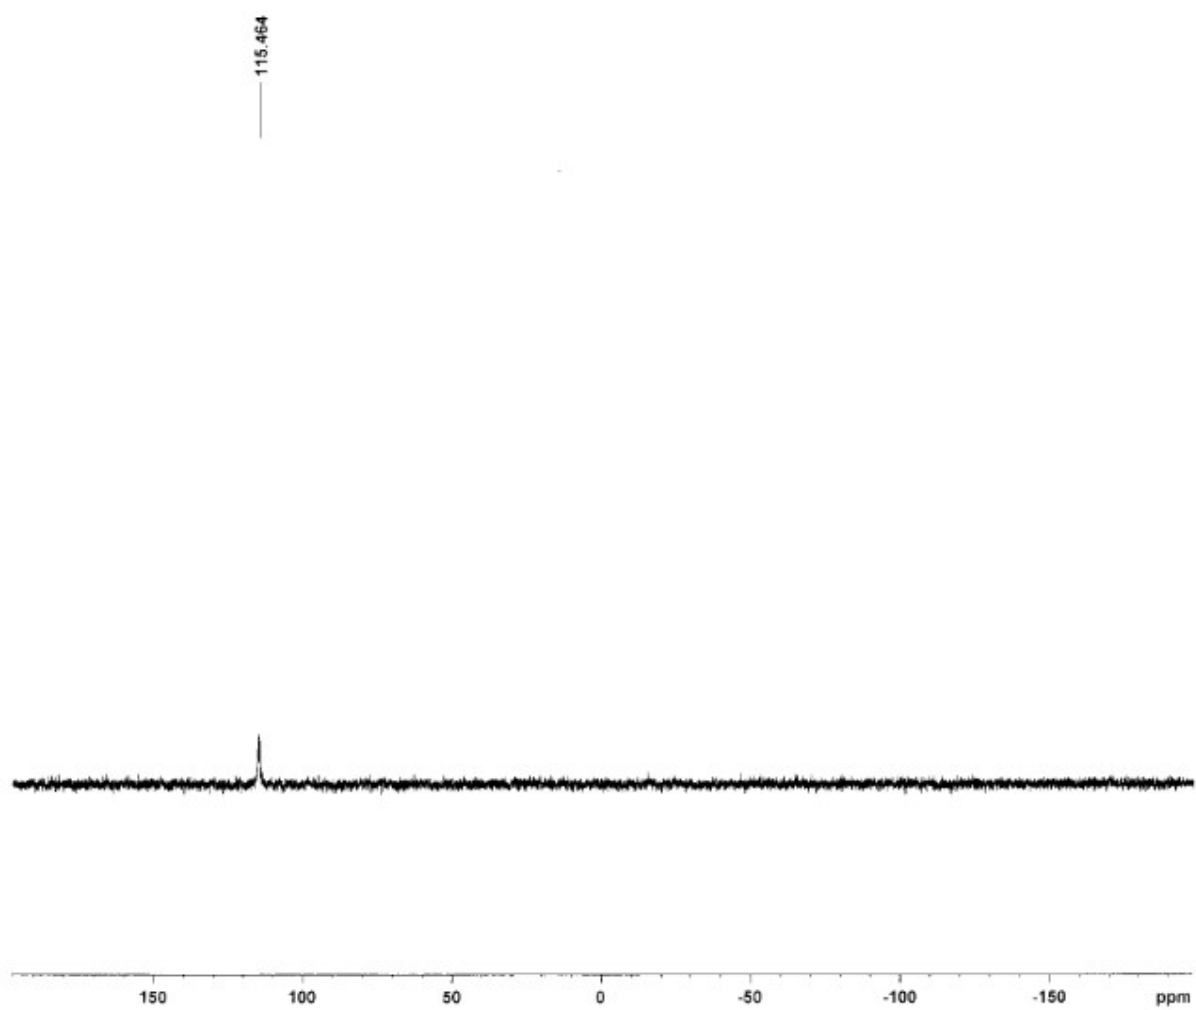

**Figure S4.**  $^{31}\text{P}$   $\{^1\text{H}\}$  NMR (162 MHz, 25 °C) spectrum of **4** in  $\text{CDCl}_3$ .

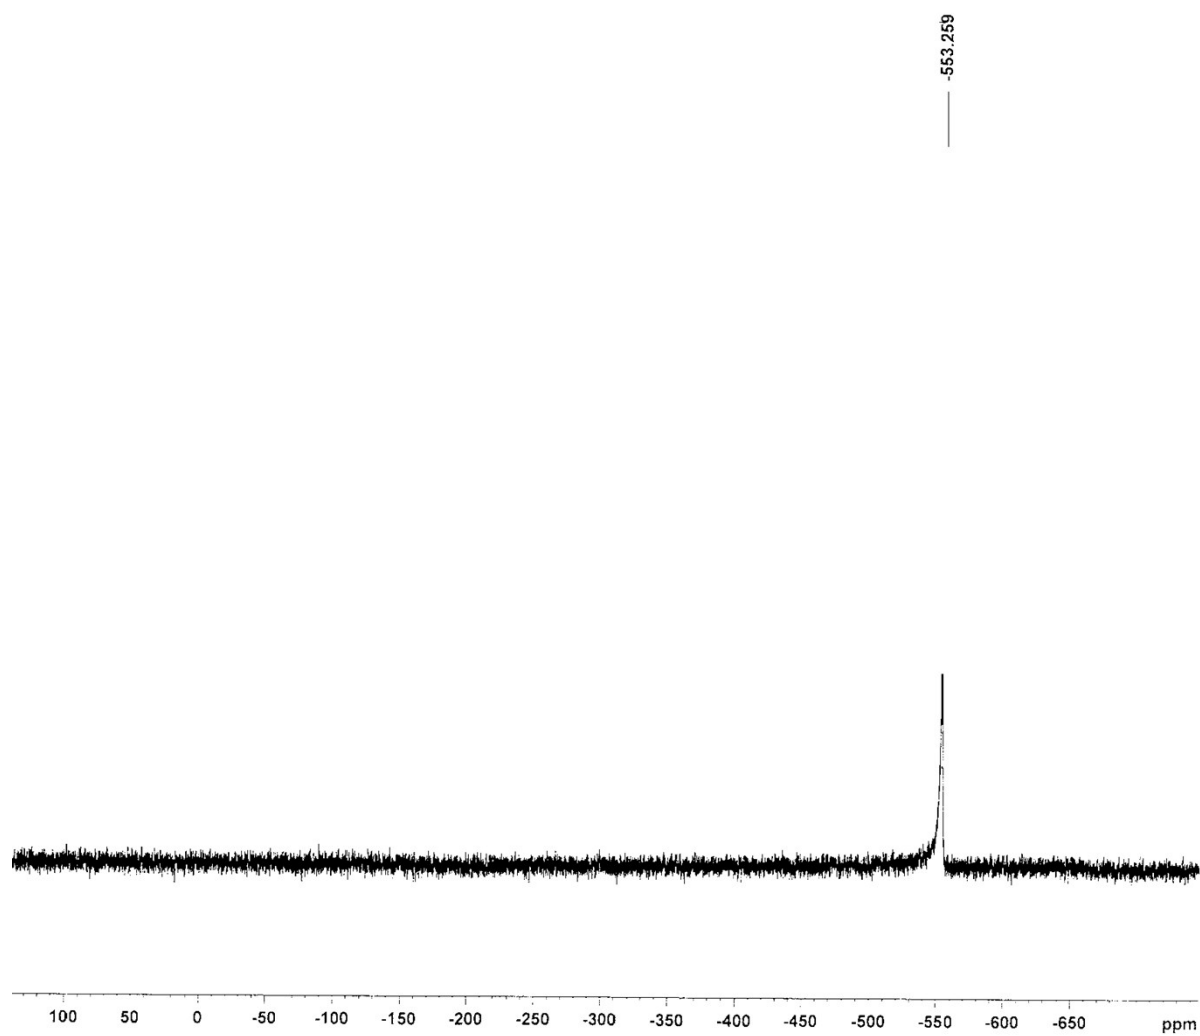

**Figure S5.**  $^{51}\text{V}$   $\{^1\text{H}\}$  NMR (105 MHz, 25 °C) spectrum of **4** in  $\text{CDCl}_3$ .

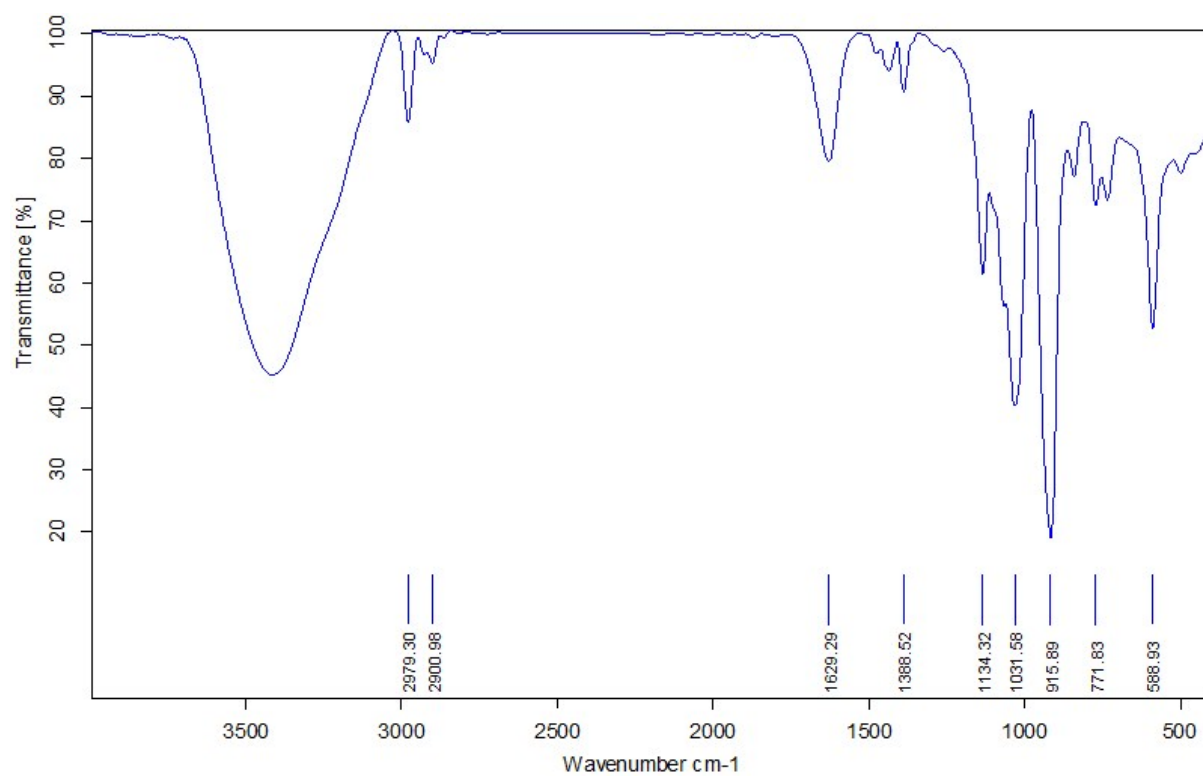

**Figure S6.** IR (KBr) spectrum (400-4000  $\text{cm}^{-1}$  region) of **3**.

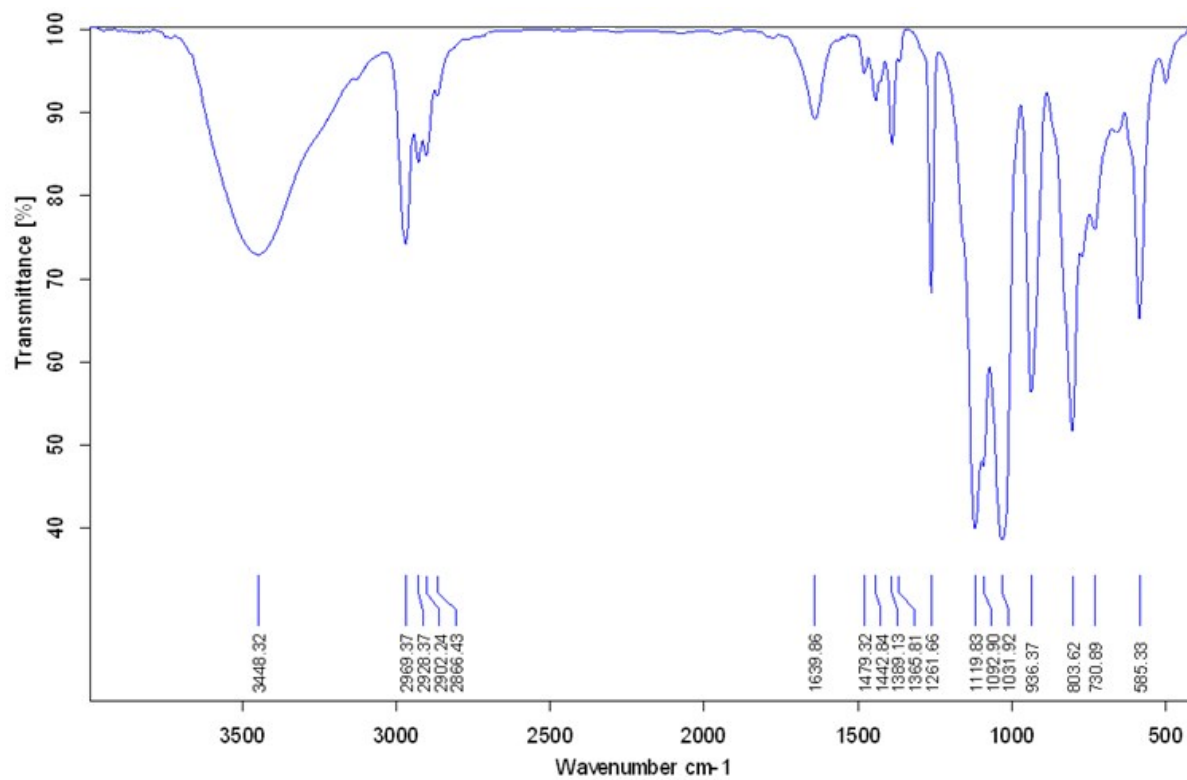

**Figure S7.** IR (KBr) spectrum (400-4000  $\text{cm}^{-1}$  region) of **4**.



## 2. Mass Spectra of 4

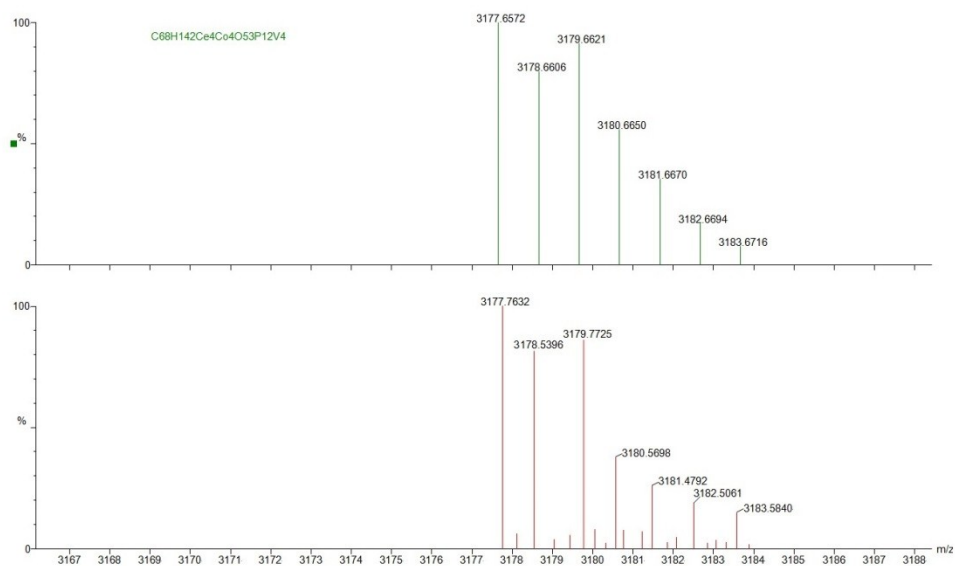

**Figure S8.** The  $[M]^+$  signal in the MALDI mass spectrum of **4** (bottom) and the simulated spectrum (top).

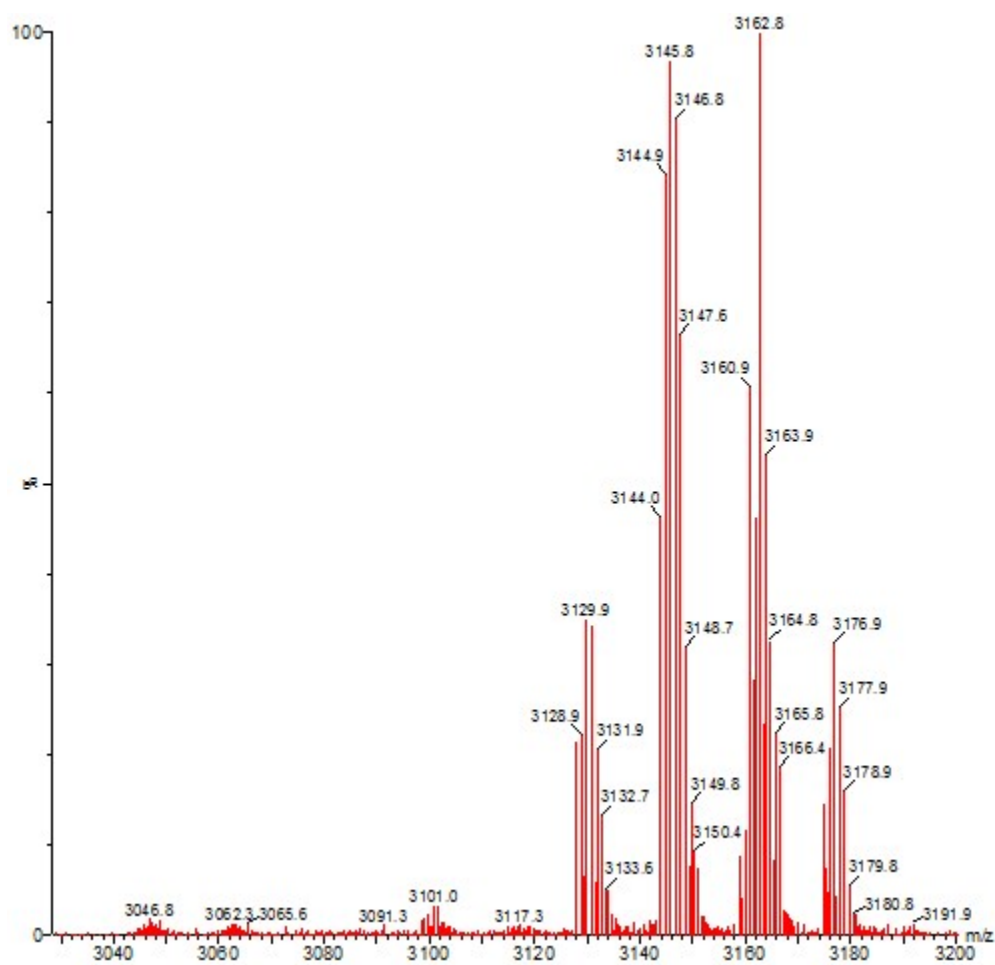

**Figure S9.** MALDI mass spectrum ( $m/z = 3020 - 3200$ ) of the reaction mixture after the catalytic oxidation of methyl *p*-tolylsulfide with **4** and TBHP in  $\text{CH}_2\text{Cl}_2$ .



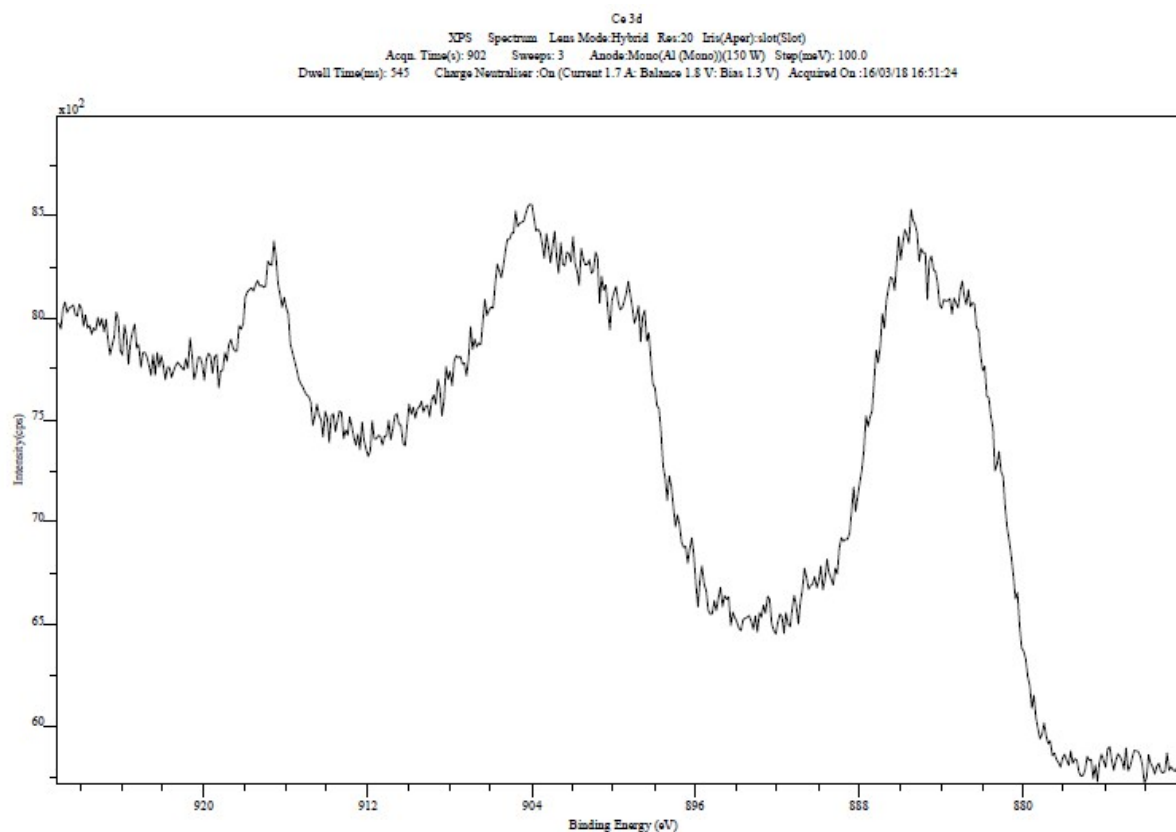

**Figure S11.** Ce region of the XPS spectrum of **4**

The observed signal at ca. 916 eV is characteristic of Ce(IV) (cf. lit. 917 eV<sup>a</sup>). The absence of signal at ca. 880 eV indicates the absence of Ce(III) in **4**.

<sup>a</sup>Beche *et al.*, *Surf. Interface Anal.* 2008, **40**, 264–267.

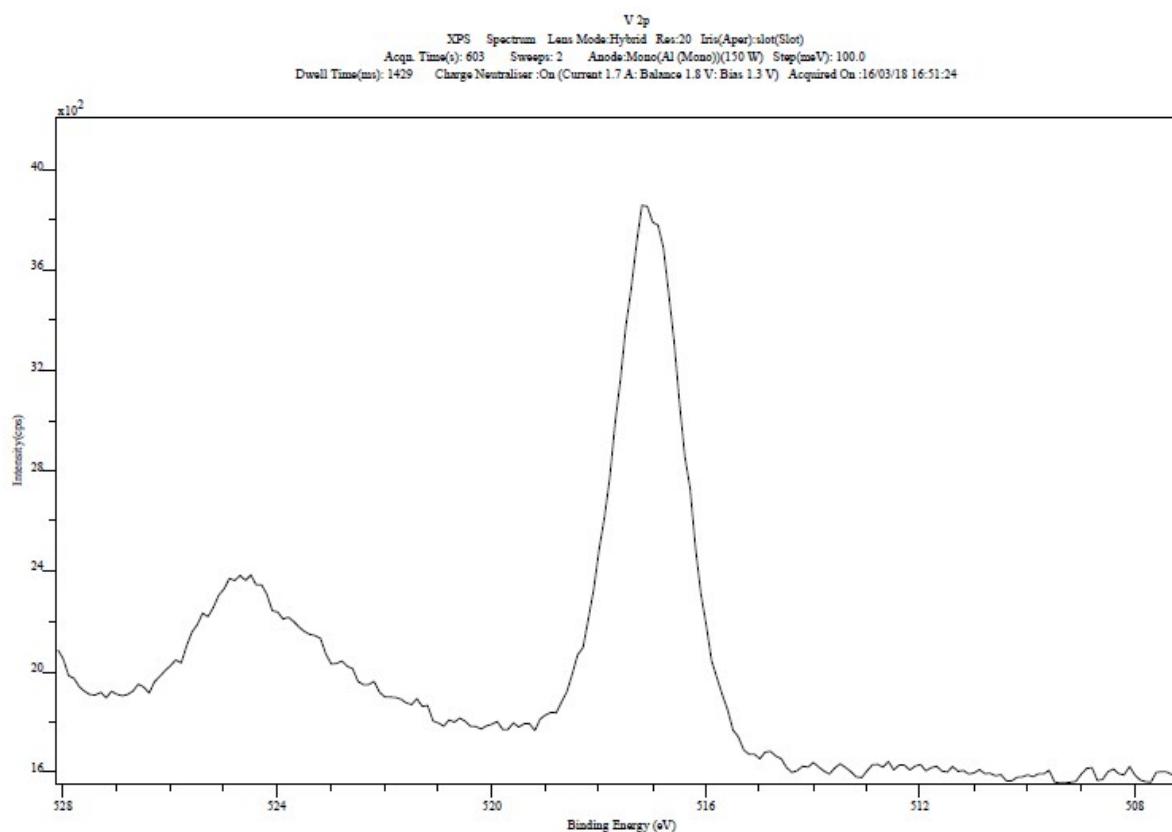

**Figure S12.** V region of the XPS spectrum of **4**

The peaks at ca. 516.5 (V 2p<sub>3/2</sub>) and 524.5 (V 2p<sub>1/2</sub>) eV are characteristic of V(V) (cf. lit. 517 and 525 eV,<sup>b,c</sup> respectively).

<sup>b</sup> C. D. Wagner, A. V. Naumkin, A. Kraut-Vass, J. W. Allison, C. J. Powell, J. R. Jr. Rumble, *NIST Standard Reference Database 20*, Version 3.4 (<http://srdata.nist.gov/xps/>) 2003.

<sup>c</sup> M. C. Biesinger, L. W. M. Lau, A. R. Gerson, R. St. C. Smart, Resolving Surface Chemical States in XPS Analysis of First Row Transition Metals, Oxides and Hydroxides: Sc, Ti, V, Cu and Zn, *Applied Surface Science*, 2010, **257**, 887–898.
